# Supplementary material
Source: Springer Nature journal article supplement (https://www.springermedizin.de/resource/supplementary/12936_2009_1055_MOESM4_ESM.pdf/9548872)

**An. gambiae**

**An. funestus**

**An. arabiensis**

**An. moucheti**

**An. nili**

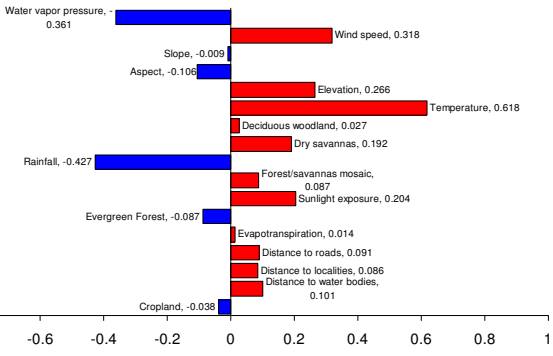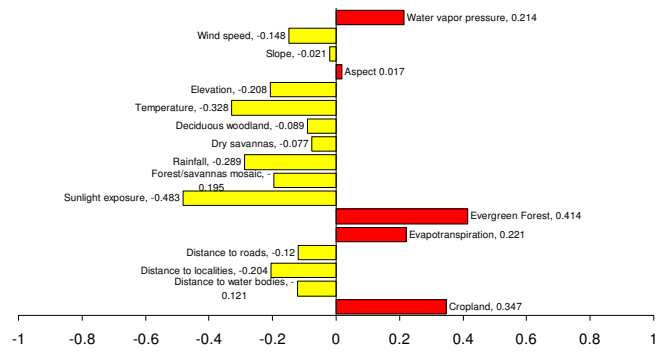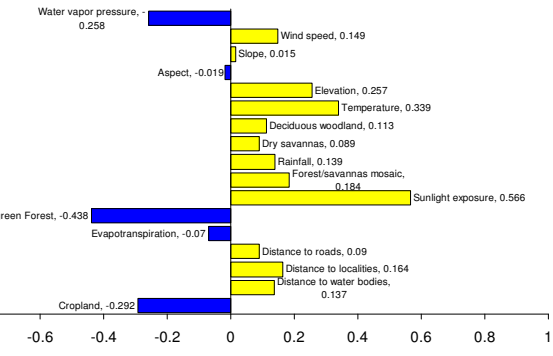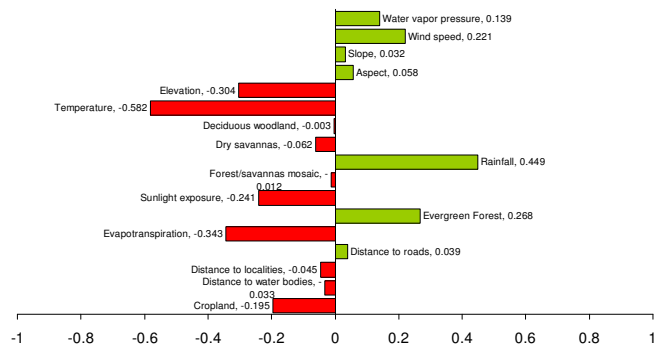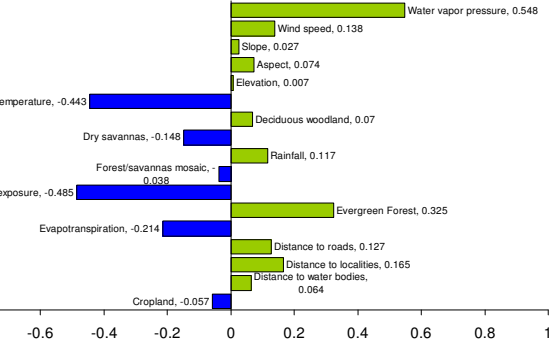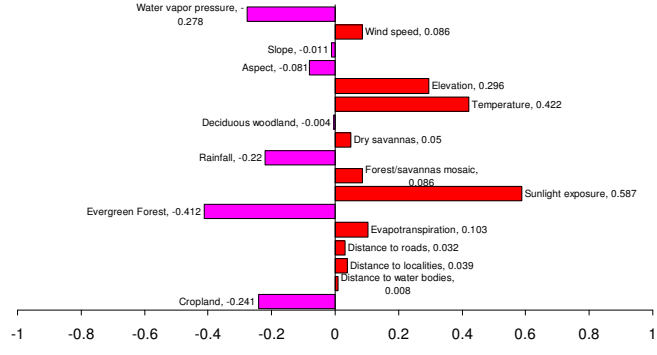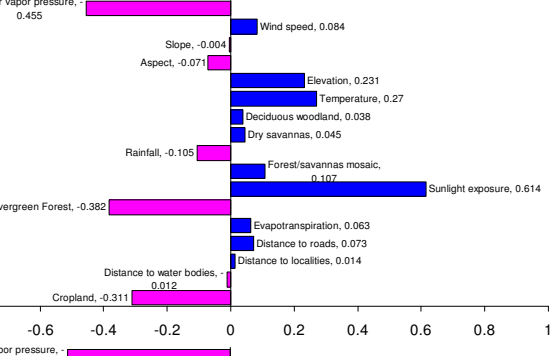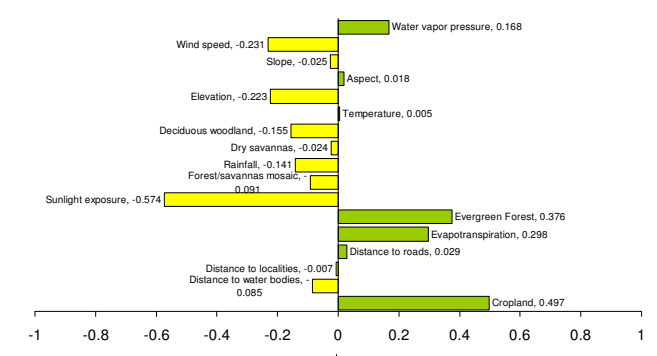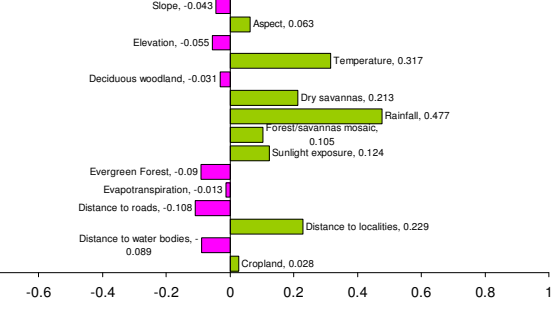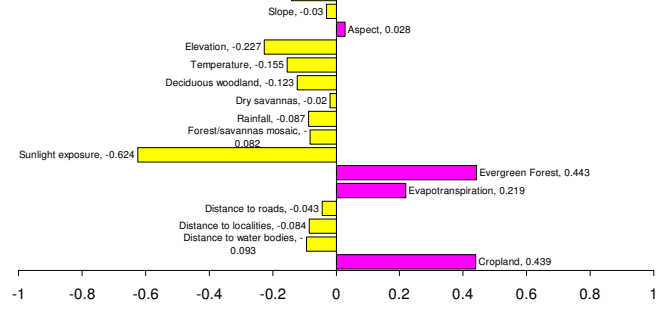

Supplement: MOESM4 [file 9548872]
